# Supplementary material
Source: publisher figshare collection journal article supplement (https://diabetesjournals.figshare.com/ndownloader/files/34638245)

**Supplemental Material.** Study protocol. The Dexcom G6-Pro accuracy was assessed over the 10 days of sensor wear by comparing time matched values to:

- i) Self-monitoring of blood glucose (SMBG) performed by the participants 4 to 7 times per day while outside the hemodialysis sessions (blue boxes).
- ii) Venous blood glucose measurements were obtained during hemodialysis sessions on Days 4, 6 and 8 (orange boxes). Blood samples from the venous line of the hemodialysis circuit were obtained by study staff at pre-specified time points to capture the early shifts in glucose during the hemodialysis session.

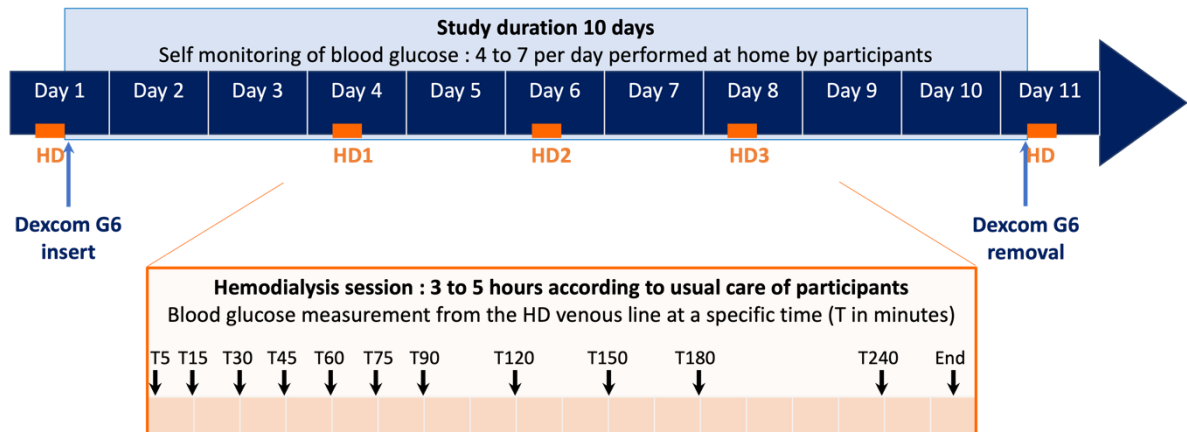

Supplement: Supplementary file 1 [file 34638245]
